# Supplementary material for: ModeLang: A New Approach for Experts-Friendly Viral Infections Modeling
Source: Comput Math Methods Med. 2013 Dec 18;2013:320715. doi: 10.1155/2013/320715 (PMC3878415; doi:10.1155/2013/320715)
Supplement: Supplementary file 1 — The Supplementary Material for this article containts four file. (1) Example XML files packed into one ZIP archive with the definition of keywords used to describe viral infection models. (2) The XML Schema (XSD) definition of the format that should be used to create an XML file with a keywords dictionary. (3) The source code and the Windows binary of an example parser implementation written in C++. (4) Archive with definition of example models of HIV and HCV infection presented in the article together with a full log from parsing process. [file 320715.f1.zip › Supp/Sup2 - parser.xsd]

<?xml version="1.0" encoding="utf-8"?>
<xs:schema id="constraints"
    targetNamespace="http://tempuri.org/parser.xsd"
    elementFormDefault="qualified"
    xmlns="http://tempuri.org/parser.xsd"
    xmlns:mstns="http://tempuri.org/parser.xsd"
    xmlns:xs="http://www.w3.org/2001/XMLSchema"
>
  <xs:element name="constraints">
    <xs:complexType>
      <xs:sequence>
        <xs:element maxOccurs="5" name="constraintsGroup">
          <xs:complexType>


            <xs:sequence>

              <xs:element maxOccurs="unbounded" name="constraint">
                <xs:complexType>
                  <xs:sequence>
                    <xs:element name="value" type="xs:string" minOccurs="1" maxOccurs="1"/>
                  </xs:sequence>

                </xs:complexType>
              </xs:element>
              
            </xs:sequence>
            <xs:attribute name="id" type="xs:integer" use="required"/>
            
          </xs:complexType>
        </xs:element>
      </xs:sequence>
     </xs:complexType>
  </xs:element>

  <!-- ANOTHER ELEMENT -->
  
  <xs:element name="keywords">
    <xs:complexType>
      <xs:sequence>
        <xs:element maxOccurs="unbounded" name="keyword">
          <xs:complexType>


            <xs:sequence>
              <!-- START OF BASE -->
              <xs:element maxOccurs="1" minOccurs="0" name="base">
                <xs:complexType>
                  <xs:sequence>
                   
                    <xs:element maxOccurs="1" minOccurs="0" name="verbs">
                      <xs:complexType>
                        <xs:sequence>
                          
                          <xs:element maxOccurs="unbounded" name="verb">
                            <xs:complexType>
                              <xs:sequence>
                                
                    <xs:element name="value" type="xs:string" minOccurs="1"  maxOccurs="1"/>
                                
                              </xs:sequence>
                            </xs:complexType>
                          </xs:element>
                          
                        </xs:sequence>
                      </xs:complexType>
                    </xs:element>

                    <xs:element maxOccurs="1" minOccurs="0" name="adjectives">
                      <xs:complexType>
                        <xs:sequence>

                          <xs:element maxOccurs="unbounded" name="adjective">
                            <xs:complexType>
                              <xs:sequence>

                                <xs:element name="value" type="xs:string" minOccurs="1"  maxOccurs="1"/>

                              </xs:sequence>
                            </xs:complexType>
                          </xs:element>

                        </xs:sequence>
                      </xs:complexType>
                    </xs:element>

                    <xs:element maxOccurs="1" minOccurs="0" name="prepositions">
                      <xs:complexType>
                        <xs:sequence>

                          <xs:element maxOccurs="unbounded" name="preposition">
                            <xs:complexType>
                              <xs:sequence>

                                <xs:element name="value" type="xs:string" minOccurs="1" maxOccurs="1"/>

                              </xs:sequence>
                            </xs:complexType>
                          </xs:element>

                        </xs:sequence>
                      </xs:complexType>
                    </xs:element>

                  </xs:sequence>
                </xs:complexType>
              </xs:element>
              <!-- END OF BASE -->
              
              <!-- START OF ALT -->
              <xs:element maxOccurs="1" minOccurs="0" name="alt">
                <xs:complexType>
                  <xs:sequence>

                    <xs:element maxOccurs="1" minOccurs="0" name="verbs">
                      <xs:complexType>
                        <xs:sequence>

                          <xs:element maxOccurs="unbounded" name="verb">
                            <xs:complexType>
                              <xs:sequence>

                                <xs:element name="value" type="xs:string" maxOccurs="1"/>

                              </xs:sequence>
                            </xs:complexType>
                          </xs:element>

                        </xs:sequence>
                      </xs:complexType>
                    </xs:element>

                    <xs:element maxOccurs="1" minOccurs="0" name="adjectives">
                      <xs:complexType>
                        <xs:sequence>

                          <xs:element maxOccurs="unbounded" name="adjective">
                            <xs:complexType>
                              <xs:sequence>

                                <xs:element name="value" type="xs:string" maxOccurs="1"/>

                              </xs:sequence>
                            </xs:complexType>
                          </xs:element>

                        </xs:sequence>
                      </xs:complexType>
                    </xs:element>

                    <xs:element maxOccurs="1" minOccurs="0" name="prepositions">
                      <xs:complexType>
                        <xs:sequence>

                          <xs:element maxOccurs="unbounded" name="preposition">
                            <xs:complexType>
                              <xs:sequence>

                                <xs:element name="value" type="xs:string" maxOccurs="1"/>

                              </xs:sequence>
                            </xs:complexType>
                          </xs:element>

                        </xs:sequence>
                      </xs:complexType>
                    </xs:element>

                  </xs:sequence>
                </xs:complexType>
              </xs:element>
              <!-- END OF ALT -->
            </xs:sequence>
            <xs:attribute name="ruleType" use="required"/>

          </xs:complexType>
        </xs:element>
      </xs:sequence>
    </xs:complexType>
  </xs:element>

</xs:schema>
